# Supplementary material for: Pyrene-functionalized triazole-linked 2′-deoxyuridines—probes for discrimination of single nucleotide polymorphisms (SNPs)
Source: Royal Society of Chemistry journal article supplement (doi:10.1039/c0cc01133a), 2010-01-01

## Supporting Information

### Pyrene-functionalized triazole-linked 2'-deoxyuridines - probes for discrimination of single nucleotide polymorphisms (SNPs)

Michael E. Østergaard, Dale C. Guenther, Pawan Kumar, Bharat Baral, Lee Deobald, Andrzej J. Paszczynski, Pawan K. Sharma and Patrick J. Hrdlicka.

#### Contents

|                                                                                     |     |
|-------------------------------------------------------------------------------------|-----|
| General experimental section                                                        | S2  |
| Experimentals 2X, 2Y, 3X & 3Y                                                       | S2  |
| Oligonucleotide synthesis                                                           | S5  |
| MALDI-MS of synthesized ONs                                                         | S5  |
| Protocol for thermal denaturation studies                                           | S6  |
| Representative thermal denaturation curves                                          | S7  |
| Protocol for fluorescence studies                                                   | S8  |
| Steady state fluorescence emission spectra                                          | S8  |
| Thermal denaturation temperatures and steady state fluorescence spectra against RNA | S11 |
| NMR spectra                                                                         | S12 |

**Author contributions:** MEØ/PJH designed study; PK/BB synthesized starting materials; DCG/PK synthesized and characterized novel compounds; MEØ synthesized and characterized ONs; LD/AJP facilitated MS analysis of nucleosides and ONs; MEØ performed all thermal denaturation and fluorescence experiments; MEØ/PJH interpreted data and wrote main manuscript; MEØ/DCG/PK/PJH wrote supporting information; all authors reviewed manuscript/supporting information.

**General experimental section.** All reagents and solvents were of analytical grade and obtained from commercial suppliers and used without further purification. Petroleum ether of the distillation range 60–80 °C was used. Anhydrous dichloromethane, 1,2-dichloroethane and DIPEA were dried through storage over activated 4Å molecular sieves. Water content of the anhydrous solvents was checked by a Karl-Fischer apparatus. Reactions were conducted under an atmosphere of argon whenever anhydrous solvents were used. All reactions were monitored by thin-layer chromatography (TLC) using silica gel coated plates with fluorescence indicator (SiO<sub>2</sub>-60, F-254) which were visualized a) under UV light or, b) by dipping in 5% conc. sulphuric acid in absolute ethanol (v/v) followed by heating. Silica gel column chromatography was performed with Silica gel 60 (particle size 0.040–0.063 mm, Merck) using moderate pressure (pressure ball). Silica gel columns were built with an initial starting eluent containing 1% (v/v) of Et<sub>3</sub>N. Evaporation of solvents was carried out under reduced pressure with a temperature not exceeding 50 °C. After column chromatography, appropriate fractions were pooled, evaporated and dried at high vacuum for at least 12 h to give the obtained products in high purity (>95%) which was ascertained by 1D NMR techniques. Chemical shifts of <sup>1</sup>H NMR (500 MHz), <sup>13</sup>C NMR (125 MHz) and <sup>31</sup>P NMR (121.5 MHz) are reported in parts per million (ppm) relative to deuterated solvent or other internal standards (tetramethylsilane, and 80% phosphoric acid for <sup>1</sup>H and <sup>31</sup>P NMR, respectively). Exchangeable (ex) protons were detected by disappearance of peaks on D<sub>2</sub>O addition. Assignments of NMR spectra are based on 2D spectra (COSY, HSQC) and DEPT-spectra. Quaternary carbons are only assigned if HSQC and DEPT spectra indicate their presence (absence of signals). MALDI-HRMS were recorded in positive ion mode on a Quadropole Time-Of-Flight tandem Mass Spectrometer (Q-TOF Premiere) equipped with a MALDI source (Waters Micromass LTD., U.K.) using 2,5-dihydroxybenzoic acid as a matrix and PEG as an internal standard.

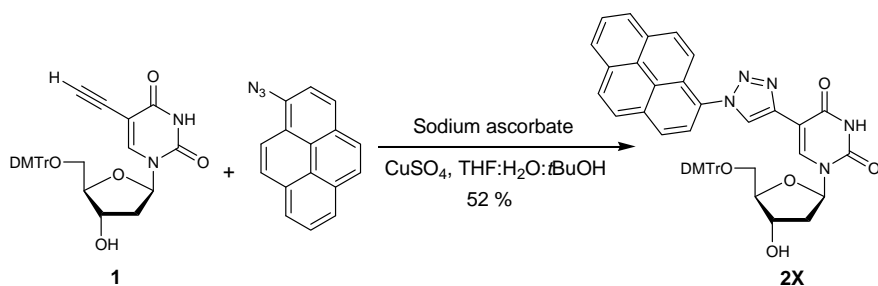

**2'-Deoxy-5-(1-(pyrenyl)-1H-1,2,3-triazol-4-yl)uridine (2X).** Nucleoside **1** (0.30 g, 0.53 mmol) was dissolved in THF:H<sub>2</sub>O:tBuOH (10 mL, 3:1:1, v/v/v), and to this was added aq. sodium ascorbate (1M, 1.2 mL, 1.2 mmol), aq. CuSO<sub>4</sub> (1.1 mL, 7.5%, w/v, 0.32 mmol), and 1-azidopyrene (200 mg, 0.80 mmol). The solution was stirred at rt for 4 h, whereupon it was diluted with EtOAc (30 mL) and brine (30 mL) and the phases were separated. The organic phase was washed with sat. aq. NaHCO<sub>3</sub> (30 mL), and the combined aqueous phase was back-extracted with EtOAc (30 mL). The combined organic phase was dried (Na<sub>2</sub>SO<sub>4</sub>), evaporated at reduced pressure, and the resulting crude purified by column chromatography (0–100% EtOAc in petroleum ether, v/v) to afford **2X** (220 mg, 52%) as a yellow solid. *R*<sub>f</sub> = 0.3 (70% EtOAc in petroleum ether, v/v); MALDI-HRMS *m/z* 820.2701 ([*M*+Na]<sup>+</sup>, C<sub>48</sub>H<sub>39</sub>N<sub>5</sub>O<sub>7</sub>Na<sup>+</sup> calc. 820.2742). <sup>1</sup>H NMR (CDCl<sub>3</sub>) δ 9.24 (s, 1H, ex, NH) 8.69 (s, 1H, H-triazole), 8.66 (s, 1H, H6), 8.27 (d, 1H, *J* = 7.5 Hz, Ar), 8.22–8.25 (m, 2H, Ar), 8.16–8.18 (d, 1H, *J* = 9.0 Hz, Ar), 8.09–8.10 (m, 2H, Ar), 8.06–8.07 (d, 1H, *J* = 7.5 Hz, Ar), 8.04 (d, 1H, *J* = 8.0 Hz, Ar), 7.86 (d, 1H, *J* = 9.0 Hz, Ar) 7.46–7.48 (m, 2H, Ar), 7.37–7.39 (m, 4H, Ar), 7.27–7.30 (m, 2H, Ar) 7.17–7.20 (m, 1H, Ar) 6.85 (d, 4H, *J* = 9.0 Hz, Ar), 6.38 (t, 1H, *J* = 6.5 Hz, H1'), 4.49–4.52

(m, 1H, H3'), 4.10-4.13 (m, 1H, H4'), 3.73 (s, 6H, CH<sub>3</sub>O), 3.55-3.58 (m, 1H, H5'), 3.48-3.51 (m, 1H, H5'), 2.56-2.59 (m, 1H, H2'<sub>a</sub>), 2.49 (bs, 1H, ex, 3'-OH), 2.37-2.42 (m, 1H, H2'<sub>b</sub>); <sup>13</sup>C NMR (CDCl<sub>3</sub>, 75.5 MHz)  $\delta$  161.0 (C), 158.6 (C), 149.5 (C), 144.6 (C), 139.0 (C), 136.4 (C6), 135.7 (C), 135.6 (C), 132.2 (C), 131.1 (C), 130.7 (C), 130.4 (C), 130.1 (Ar), 130.0 (Ar), 129.6 (Ar), 129.1 (Ar), 128.9 (Ar), 128.1 (Ar), 127.9 (Ar), 126.9 (Ar), 126.8 (Ar), 126.7 (Ar), 126.3 (Ar), 126.1 (C), 126.0 (Ar), 125.1 (C), 125.0 (CH-triazole), 124.7 (Ar), 124.2 (C), 123.3 (Ar), 121.3 (Ar), 113.3 (Ar), 106.1 (C), 86.9 (C), 85.91 (C4'), 85.88 (C1'), 72.6 (C3'), 63.8 (C5'), 55.2 (OCH<sub>3</sub>), 40.5 (C2').

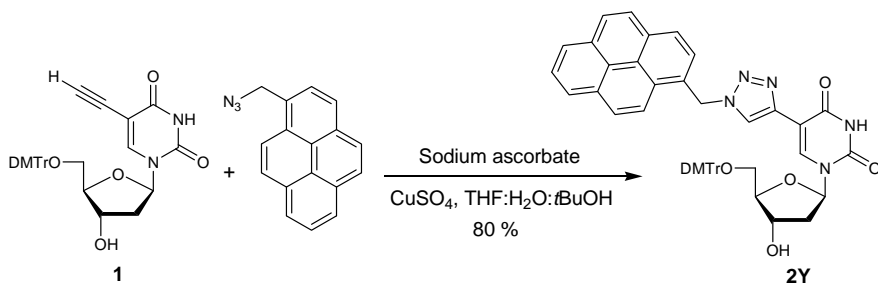

**2'-Deoxy-5-(1-(pyrenmethyl)-1H-1,2,3-triazol-4-yl)uridine (2Y).** To a solution of nucleoside **1** (86 mg, 0.15 mmol) and 1-azidomethylpyrene (58 mg, 0.21 mmol) in THF:H<sub>2</sub>O:tBuOH (5 mL, 3:1:1, v/v/v) was added aq. sodium ascorbate (1M, 280  $\mu$ L, 0.28 mmol), and aq. CuSO<sub>4</sub> (260  $\mu$ L, 7.5%, w/v, 0.077 mmol). The solution was stirred at rt for 4 h, whereupon it was diluted with EtOAc (20 mL) and brine (20 mL) and the phases were separated. The organic phase was washed with sat. aq. NaHCO<sub>3</sub> (20 mL), and the combined aqueous phase was back-extracted with EtOAc (20 mL). The combined organic phase was dried (Na<sub>2</sub>SO<sub>4</sub>), evaporated at reduced pressure, and the resulting crude purified by column chromatography (0-100% EtOAc in petroleum ether, v/v) to afford **2X** (99 mg, 80%) as a slightly yellow solid material. *R*<sub>f</sub> = 0.7 (80% EtOAc in petroleum ether, v/v); MALDI-HRMS *m/z* 818.3181 ([M+Li]<sup>+</sup>, C<sub>49</sub>H<sub>41</sub>N<sub>5</sub>O<sub>7</sub>Li<sup>+</sup> calc. 818.3161). <sup>1</sup>H NMR (DMSO-*d*<sub>6</sub>)  $\delta$  11.67 (s, 1H, ex, NH), 8.56 (d, 1H, *J* = 9.0 Hz, Ar), 8.39 (s, 1H, H-triazole), 8.34 (d, 2H, *J* = 7.5 Hz, Ar), 8.31 (d, 1H, *J* = 8.0, Ar), 8.29 (s, 1H, H6), 8.27 (d, 1H, *J* = 9.0 Hz, Ar), 8.22 (d, 1H, *J* = 9.0 Hz, Ar), 8.19 (d, 1H, *J* = 9.0 Hz, Ar), 8.11 (t, 1H, *J* = 7.5 Hz, Ar), 8.05 (d, 1H, *J* = 7.5 Hz, Ar) 7.32-7.33 (m, 2H, Ar), 7.21-7.23 (m, 4H, Ar), 7.15-7.18 (m, 2H, Ar), 7.01-7.04 (m, 1H, Ar), 6.81 (d, 4H, *J* = 8.5 Hz, Ar), 6.42 (s, 2H, CH<sub>2</sub>), 6.14 (t, 1H, *J* = 6.5 Hz, H1'), 5.31 (d, 1H, ex, *J* = 4.5 Hz, 3'-OH), 4.13- 4.15 (m, 1H, H3'), 3.91-3.93 (m, 1H, H4'), 3.62 (s, 3H, OCH<sub>3</sub>), 3.61 (s, 3H, OCH<sub>3</sub>) 3.18-3.19 (m, 2H, H5'), 2.17-2.27 (m, 2H, H2'); <sup>13</sup>C NMR (DMSO-*d*<sub>6</sub>)  $\delta$  161.0 (C), 157.9 (C), 149.4 (C), 144.7 (C), 138.8 (C), 135.41 (C6), 135.36 (C), 135.34 (C), 131.0 (C), 130.7 (C), 130.1 (C), 129.60 (Ar), 129.59 (Ar), 129.1 (C), 128.4 (C), 128.2 (Ar), 127.7 (Ar), 127.6 (Ar), 127.53 (Ar), 127.50 (Ar), 127.2 (Ar), 126.43 (Ar), 126.40 (Ar) 125.6 (Ar), 125.5 (Ar), 125.0 (Ar), 123.9 (Ar), 123.7 (Ar), 122.7 (Ar), 122.3 (CH-triazole), 113.1 (Ar), 105.0 (C), 85.7(C), 85.6 (C4'), 85.1 (C1'), 70.4 (C3'), 63.6 (C5'), 54.8 (OCH<sub>3</sub>), 50.8 (CH<sub>2</sub>), 39.7 (C2').

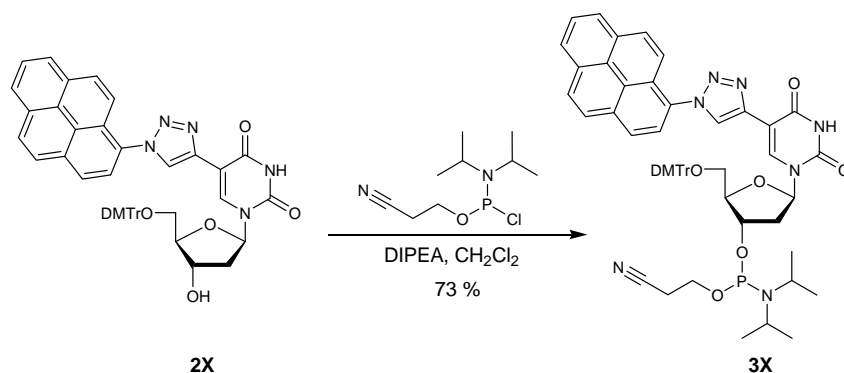

**2'-Deoxy-5-(1-(pyrenyl)-1H-1,2,3-triazol-4-yl)uridine phosphoramidite (**3X**)**. Nucleoside **2X** (0.20 g, 0.24 mmol) was coevaporated in anh. 1,2-dichloroethane (3×10mL) and redissolved in anh. CH<sub>2</sub>Cl<sub>2</sub> (4.0 mL). To this solution was dropwise added DIPEA (170 μL, 0.98 mmol) and 2-cyanoethyl-diisopropylchlorophosphoramidite (76 μL, 0.34 mmol) and stirred at rt for 3.5 h, whereupon the solvent was evaporated under reduced pressure, and the resulting crude was purified via column chromatography (0–3% MeOH in CH<sub>2</sub>Cl<sub>2</sub>, v/v) to afford amidite **3X** (0.18 g, 73%) as a slightly yellow solid. *R<sub>f</sub>* = 0.3 (5% MeOH in CH<sub>2</sub>Cl<sub>2</sub>, v/v); MALDI-HRMS *m/z* 1020.3821 ([*M*+Na]<sup>+</sup>, C<sub>57</sub>H<sub>56</sub>N<sub>7</sub>O<sub>8</sub>P Na<sup>+</sup> calc. 1020.3820). <sup>31</sup>P NMR (CDCl<sub>3</sub>) δ 149.4, 149.0.

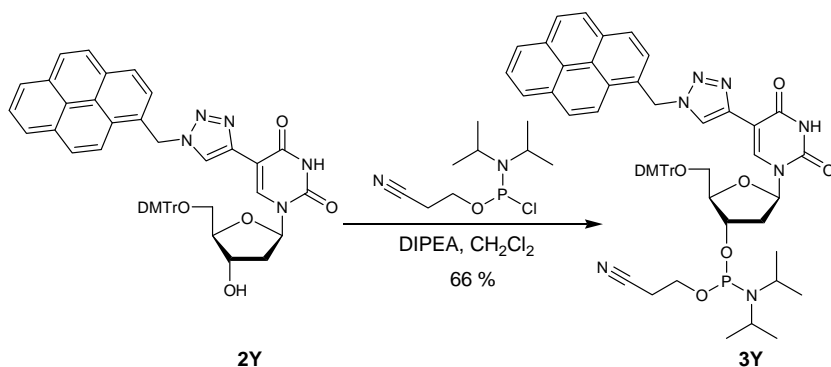

**2'-Deoxy-5-(1-(pyrenmethyl)-1H-1,2,3-triazol-4-yl)uridine phosphoramidite (**3Y**)**. Nucleoside **2Y** (0.20 g, 0.29 mmol) was coevaporated in anh. 1,2-dichloroethane (3×10mL) and redissolved in anh. CH<sub>2</sub>Cl<sub>2</sub> (4.0 mL). To this solution was dropwise added DIPEA (170 μL, 0.99 mmol) and 2-cyanoethyl-diisopropylchlorophosphoramidite (830 μL, 0.37 mmol) and stirred at rt for 2 h, whereupon the solvent was evaporated under reduced pressure, and the resulting crude was purified via column chromatography (0–3% MeOH in CH<sub>2</sub>Cl<sub>2</sub>, v/v) to afford amidite **3Y** (0.12g, 66%) as a slightly yellow solid. *R<sub>f</sub>* = 0.6 (5% MeOH in CH<sub>2</sub>Cl<sub>2</sub>, v/v); MALDI-HRMS *m/z* 1012.4142 ([*M*+H]<sup>+</sup>, C<sub>58</sub>H<sub>58</sub>N<sub>7</sub>O<sub>8</sub>P H<sup>+</sup> calc. 1012.4157). <sup>31</sup>P NMR (CDCl<sub>3</sub>) δ 149.4, 148.9.



**Oligonucleotide synthesis:** Oligonucleotides (ONs) were synthesized on a 0.2  $\mu\text{mol}$  scale performed on an Expedite 8909 Synthesizer using succinyl linked LCAA-CPG (long chain alkyl amine controlled pore glass) columns with a pore size of 500 Å. Standard procedures were used, i.e., trichloroacetic acid in  $\text{CH}_2\text{Cl}_2$  as detritylation reagent; 0.25 M 4,5-dicyanoimidazole (DCI) in  $\text{CH}_3\text{CN}$  as activator; acetic anhydride in THF as cap A solution; 1-methylimidazole in THF/pyridine (8:1, v/v) as cap B solution, and 0.02 M iodine in  $\text{H}_2\text{O}$ /pyridine/THF as the oxidizing solution. C5-Pyrene-functionalized triazole-linked phosphoramidites were incorporated using DCI as the activator and extended coupling times (15 min) which resulted in coupling yields above 98%. Cleavage from the solid support and removal of protecting groups was accomplished by treatment with concentrated aq. ammonia (55 °C, 24 h). Purification of all modified ONs was performed to minimum 80% purity using either of two methods: (a) overall synthesis yield >80%: cleavage of DMT using 80% aq. AcOH, followed by precipitation from acetone (-18 °C for 12-16 h) and washing with acetone, or (b) overall synthesis <80%: purification of ONs by RP-HPLC as described below (Table S1), followed by detritylation and precipitation as outlined under (a).

Purification of crude ONs was performed on a Varian Prostar HPLC system equipped with an XTerra MS C18 column (10  $\mu\text{m}$ , 7.8 x 150 mm) using the representative gradient protocol depicted in Table S1. The composition of all synthesized ONs was verified by MALDI MS/MS analysis (Table S2) using anthranilic acid as a matrix and recording in positive ions mode on a Quadropole Time-Of-Flight tandem Mass Spectrometer (Q-TOF Premiere) equipped with a MALDI source (Waters Micromass LTD., U.K.). Purity (>80%) was verified by RP-HPLC.

**Table S1.** Representative RP-HPLC gradient protocol.<sup>[a]</sup>

| T (min) | Buffer A (V%) | Buffer B (V%) |
|---------|---------------|---------------|
| 0       | 100           | 0             |
| 2       | 100           | 0             |
| 50      | 30            | 70            |
| 64      | 0             | 100           |
| 69      | 0             | 100           |
| 71      | 100           | 0             |
| 80      | 100           | 0             |

[a] Buffer A is 0.05 M TEAA (triethyl ammonium acetate) pH 7, while buffer B is 75% MeCN in  $\text{H}_2\text{O}$  v/v. A flow rate of 1.2 mL/min was used.

**Table S2.** MALDI-MS of synthesized ONs.<sup>[a]</sup>

| ON          | Sequences                    | Calcd $m/z$ [M] <sup>+</sup> | Found $m/z$ [M] <sup>+</sup> |
|-------------|------------------------------|------------------------------|------------------------------|
| <b>ON5</b>  | 5'-CGC AAA <u>X</u> AA ACG C | 4187.8                       | 4188.4                       |
| <b>ON6</b>  | 5'-CGC AAC <u>X</u> CA ACG C | 4139.8                       | 4140.3                       |
| <b>ON7</b>  | 5'-CGC AAG <u>X</u> GA ACG C | 4219.8                       | 4220.3                       |
| <b>ON8</b>  | 5'-CGC AAT <u>X</u> TA ACG C | 4169.8                       | 4170.3                       |
| <b>ON9</b>  | 5'-CGC AAA <u>Y</u> AA ACG C | 4201.8                       | 4202.4                       |
| <b>ON10</b> | 5'-CGC AAC <u>Y</u> CA ACG C | 4153.8                       | 4154.4                       |
| <b>ON11</b> | 5'-CGC AAG <u>Y</u> GA ACG C | 4233.8                       | 4234.4                       |
| <b>ON12</b> | 5'-CGC AAT <u>Y</u> TA ACG C | 4183.8                       | 4184.4                       |

[a] For structures of monomer **X** and **Y** see Scheme 1 in the main manuscript.

**Protocol for thermal denaturation studies:** Concentrations of unmodified ONs were estimated using the following extinctions coefficients for DNA (OD/ $\mu\text{mol}$ ): G (12.01), A (15.20), T (8.40), C (7.05); for RNA (OD/ $\mu\text{mol}$ ): G (13.70), A (15.40), U (10.00), C (9.00). Concentrations of modified ONs (**ON5-ON12**) were determined by titration of modified ONs against complementary DNA; continued addition of complementary DNA target to **ON5-ON12** resulted in increased steady-state fluorescence emission output until a plateau was reached, at which point a 1:1 stoichiometry was assumed. ONs (1.0  $\mu\text{mol}$  of each strand) were thoroughly mixed, denatured by heating and subsequently cooled to the starting temperature of the experiment. Quartz optical cells with a pathlength of 1.0 cm were used. Thermal denaturation temperatures ( $T_m$  values [ $^{\circ}\text{C}$ ]) were measured on a Cary 100 UV/VIS spectrophotometer equipped with 12-cell Peltier temperature controller and determined as the maximum of the first derivative of the thermal denaturation curve ( $A_{260}$  vs.  $T$ ) recorded in medium salt buffer ( $T_m$  buffer: 110 mM NaCl, 0.1 mM EDTA, pH adjusted with 10 mM  $\text{Na}_2\text{HPO}_4/\text{NaH}_2\text{PO}_4$ ). The temperature of the denaturation experiment ranged from at least 15  $^{\circ}\text{C}$  below  $T_m$  to 20  $^{\circ}\text{C}$  above  $T_m$  (although not below 1  $^{\circ}\text{C}$ ). A temperature ramp of 0.5  $^{\circ}\text{C}/\text{min}$  was used in all experiments. Reported thermal denaturation temperatures are an average of at least two experiments within  $\pm 1.0$   $^{\circ}\text{C}$ .

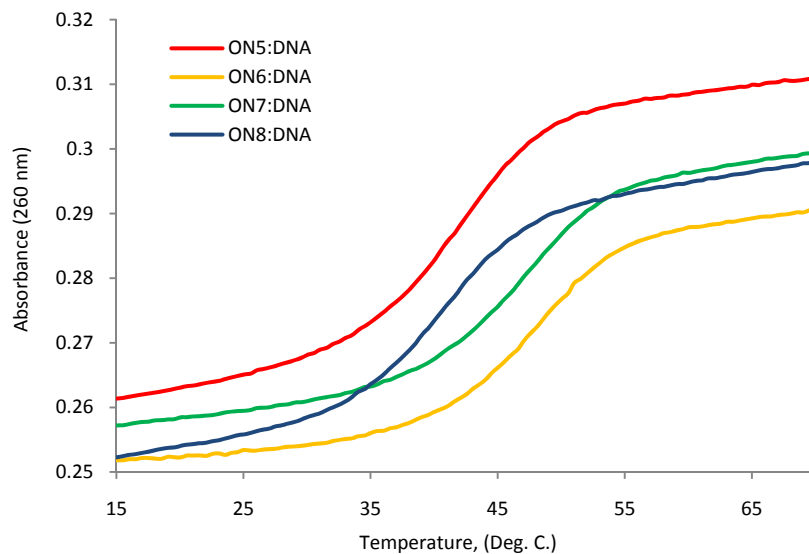

**Figure S1.** Thermal denaturation curves for duplexes between **ON5-ON8** (monomer **X**) and complementary DNA.

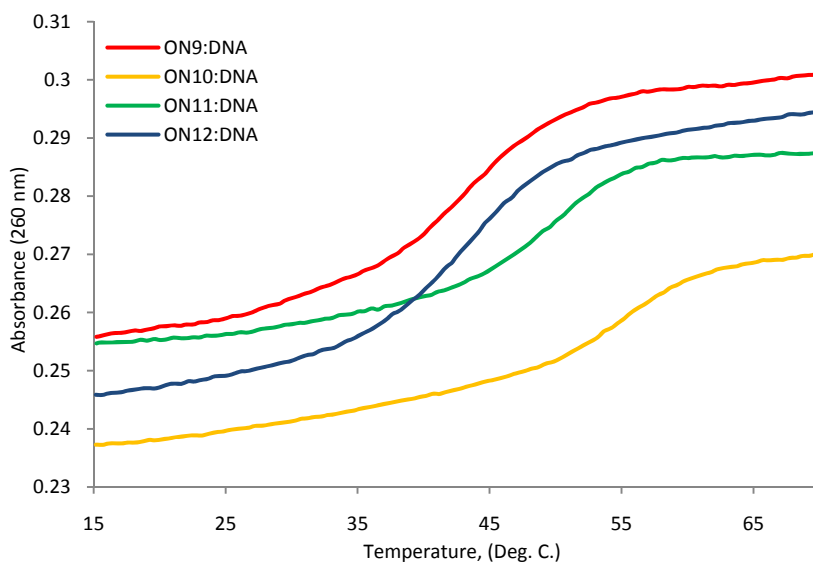

**Figure S2.** Thermal denaturation curves for duplexes between **ON9-ON12** (monomer **Y**) and complementary DNA.

**Protocol for fluorescence studies:** Steady state fluorescence emission spectra were recorded using an excitation wavelength of 344 nm on a Cary Eclipse fluorimeter using the same buffers and ON concentrations as in thermal denaturation studies and. Fluorescence emission spectra of single stranded probes (SSP) and corresponding duplexes with complementary or mismatched targets were measured at 5 °C to ensure complete hybridization to targets. Deoxygenation was deliberately not applied to the samples since the scope of the work was to determine fluorescence under aerated condition prevailing in bioassays. Solutions were heated to 80 °C over 10 min, cooled to 5 °C over 15 min, and equilibrated at this temperature for more than 5 min. Steady state fluorescence emission spectra (360–600 nm range) were obtained as an average of five scans using an excitation wavelength of 344 nm, excitation slit 5.0 nm, emission slit 5.0 nm and a scan speed of 600 nm/min.

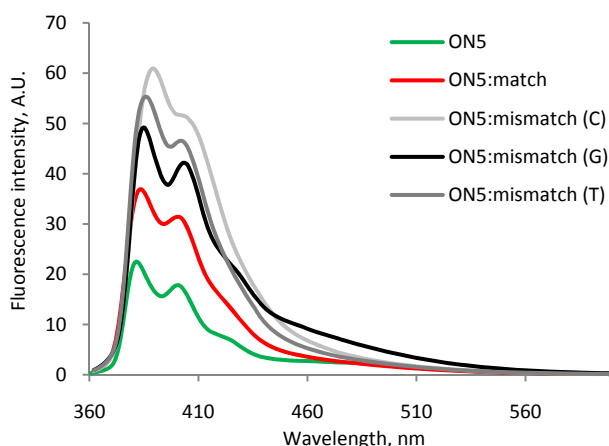

**Figure S3.** Steady state fluorescence emission spectra of single stranded **ON5** (SSP), and corresponding duplexes with matched or mismatched DNA targets (mismatched nucleotide opposite of modification is mentioned in parenthesis).

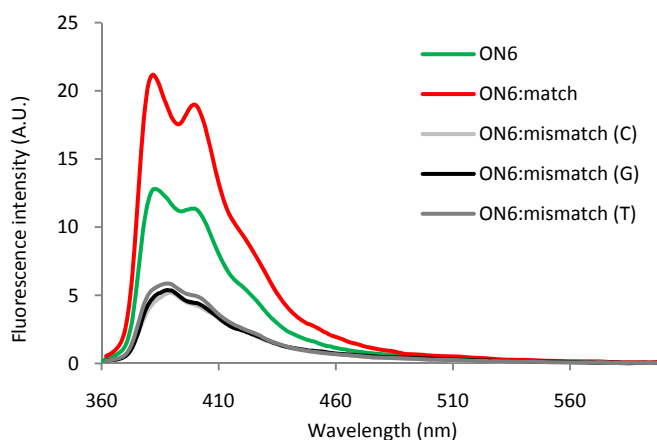

**Figure S4.** Steady state fluorescence emission spectra of single stranded **ON6** (SSP), and corresponding duplexes with matched or mismatched DNA targets (mismatched nucleotide opposite of modification is mentioned in parenthesis).

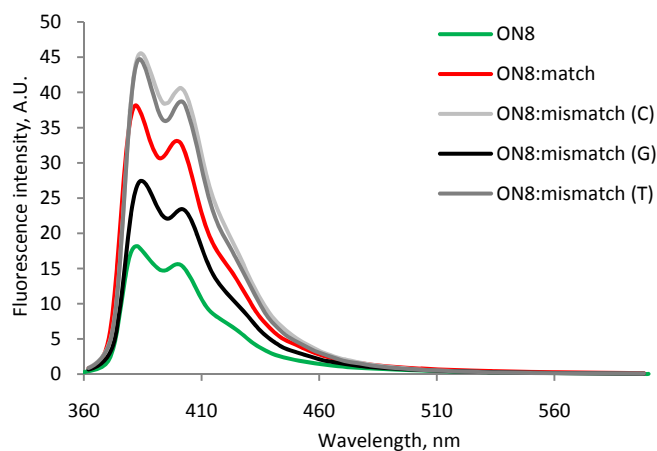

**Figure S5.** Steady state fluorescence emission spectra of single stranded **ON8** (SSP), and corresponding duplexes with matched or mismatched DNA targets (mismatched nucleotide opposite of modification is mentioned in parenthesis).

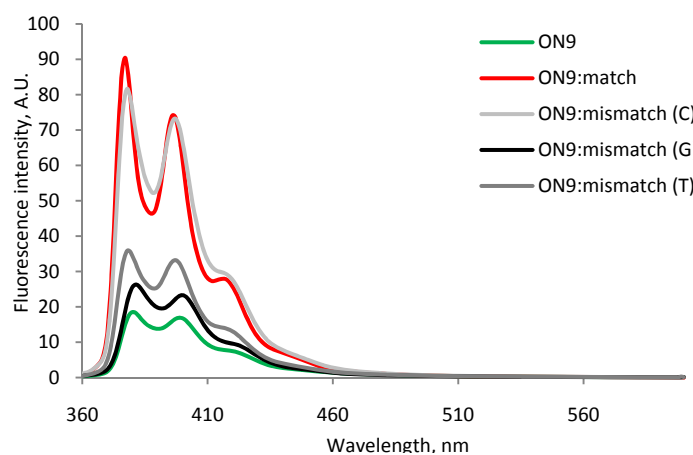

**Figure S6.** Steady state fluorescence emission spectra of single stranded **ON9** (SSP), and corresponding duplexes with matched or mismatched DNA targets (mismatched nucleotide opposite of modification is mentioned in parenthesis).

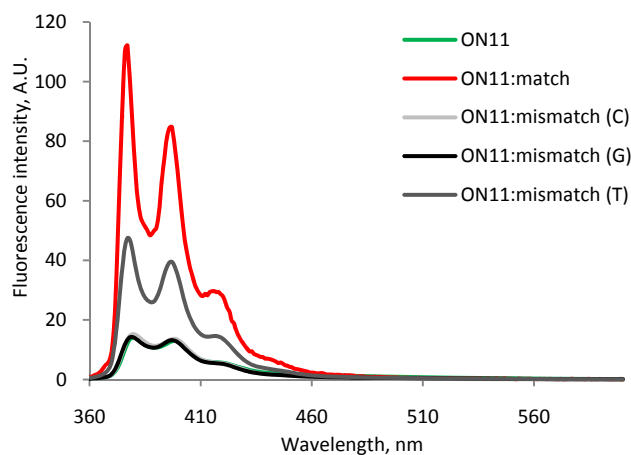

**Figure S7.** Steady state fluorescence emission spectra of single stranded **ON11** (SSP), and corresponding duplexes with matched or mismatched DNA targets (mismatched nucleotide opposite of modification is mentioned in parenthesis).

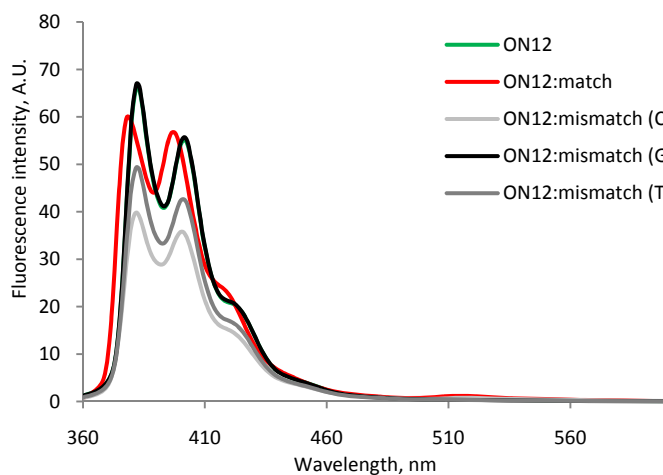

**Figure S8.** Steady state fluorescence emission spectra of single stranded **ON12** (SSP), and corresponding duplexes with matched or mismatched DNA targets (mismatched nucleotide opposite of modification is mentioned in parenthesis).

**Table S3.** Thermal denaturation temperatures of duplexes between **ON2**, **ON6** or **ON10** and complementary or mismatched RNA targets.<sup>[a]</sup>

| Sequence                                  | 3'-r(GCG UUG <b>B</b> GU UGC G)              |                                 |             |              |  |
|-------------------------------------------|----------------------------------------------|---------------------------------|-------------|--------------|--|
|                                           | $\Delta T_m/\text{mod. } [^{\circ}\text{C}]$ | $\Delta T_m [^{\circ}\text{C}]$ |             |              |  |
|                                           | <b>B=A</b>                                   | <b>B=C</b>                      | <b>B=G</b>  | <b>B=U</b>   |  |
| <b>ON2</b> 5'-CG CAA CTC AAC GC           | <b>51.5</b>                                  | 36.0 (-15.5)                    | 48.5 (-3.0) | 38.0 (-13.5) |  |
| <b>ON6</b> 5'-CG CAA <b>C</b> X C AAC GC  | <b>39.5</b> (-12.0)                          | 32.0 (-7.5)                     | 36.0 (-3.5) | 33.0 (-6.5)  |  |
| <b>ON10</b> 5'-CG CAA <b>C</b> Y C AAC GC | <b>48.0</b> (-3.5)                           | 29.5 (-18.5)                    | 41.0 (-7.0) | 35.0 (-13.0) |  |

<sup>[a]</sup> Conditions as described in footnote of Table 1.

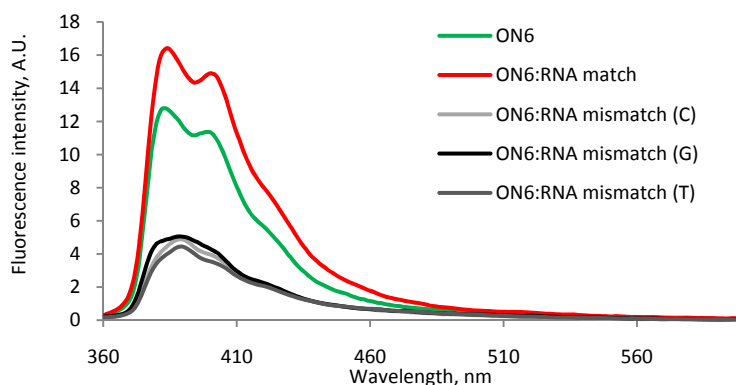

**Figure S9.** Steady state fluorescence emission spectra of single stranded **ON6** (SSP), and corresponding duplexes with matched or mismatched RNA targets (mismatched nucleotide opposite of modification is mentioned in parenthesis).

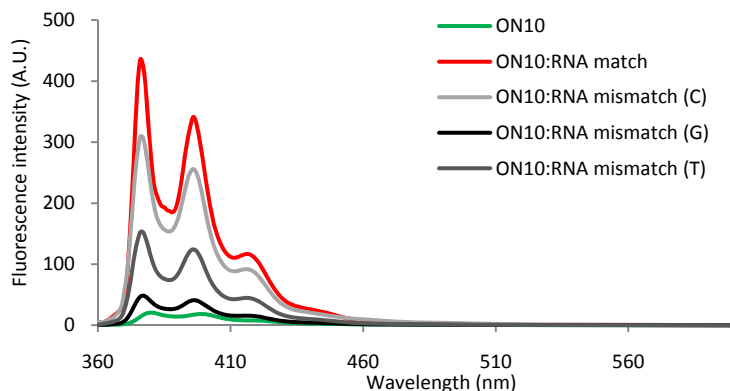

**Figure S10.** Steady state fluorescence emission spectra of single stranded **ON10** (SSP), and corresponding duplexes with matched or mismatched RNA targets (mismatched nucleotide opposite of modification is mentioned in parenthesis).

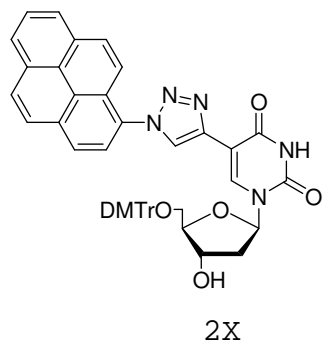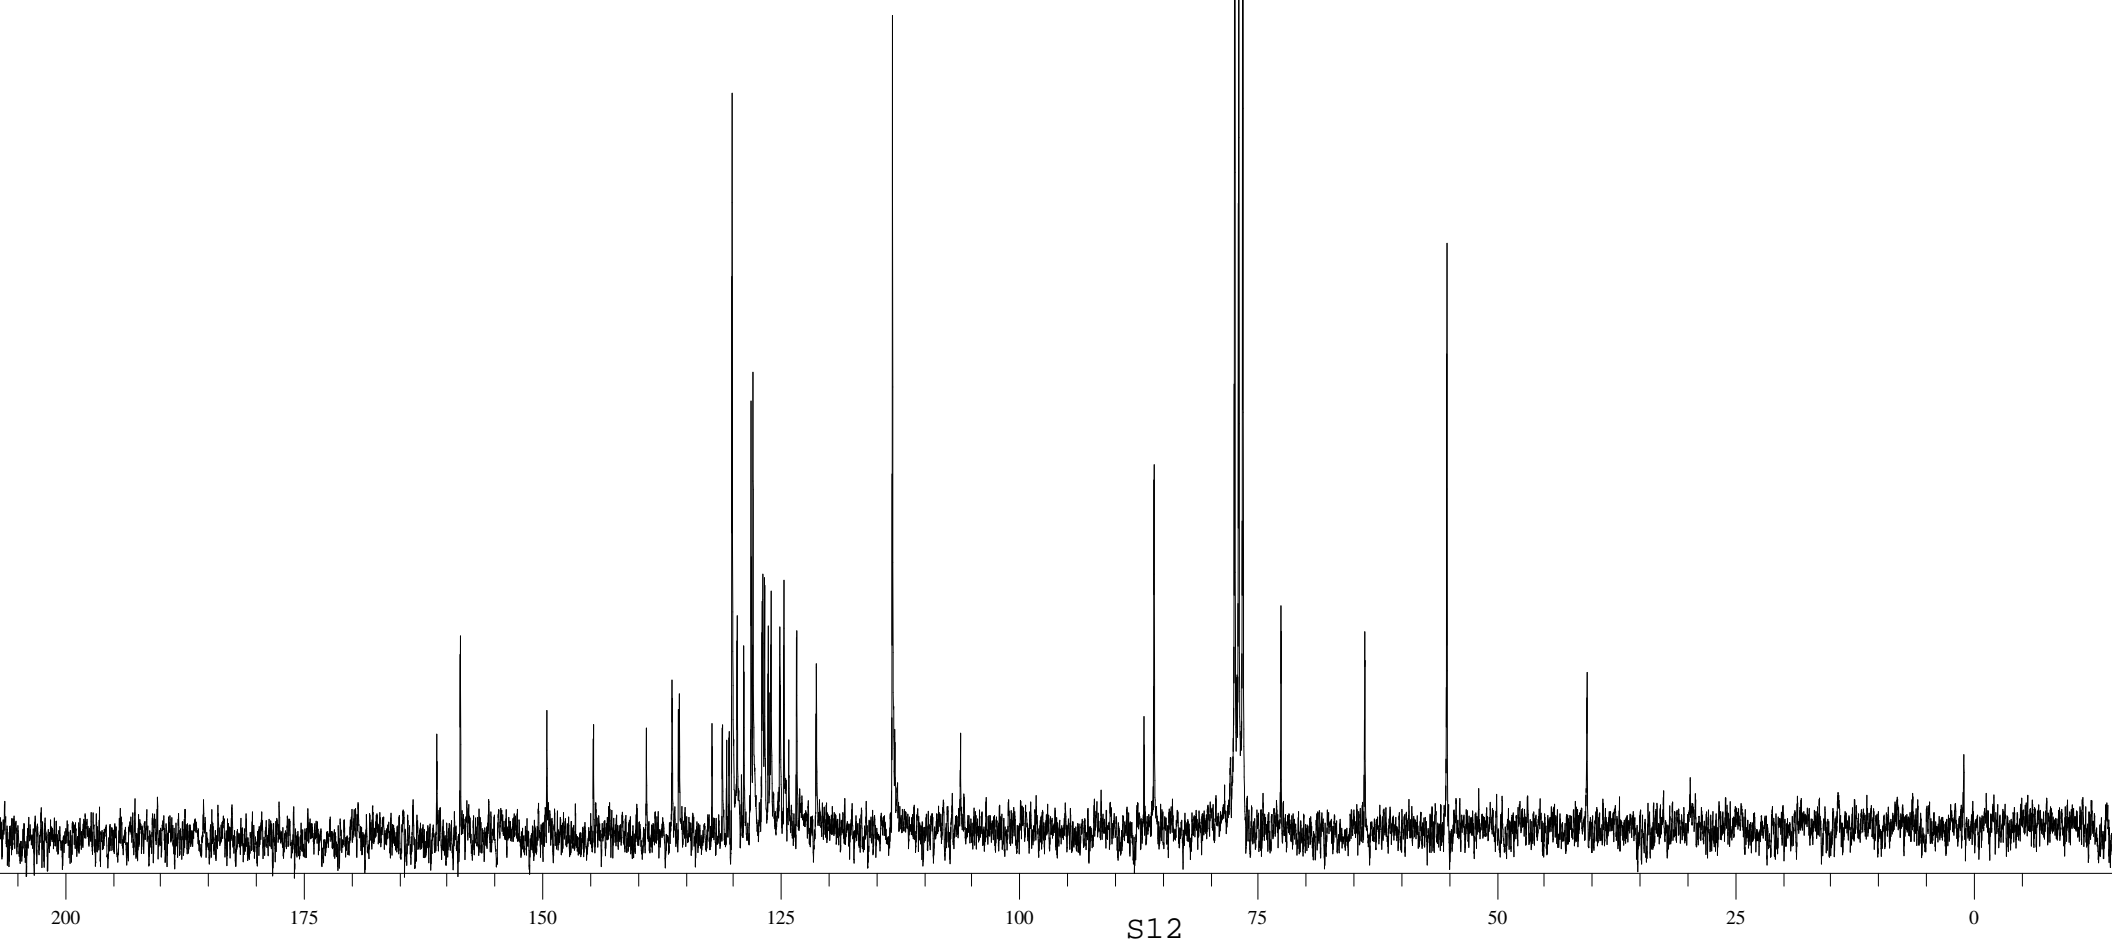



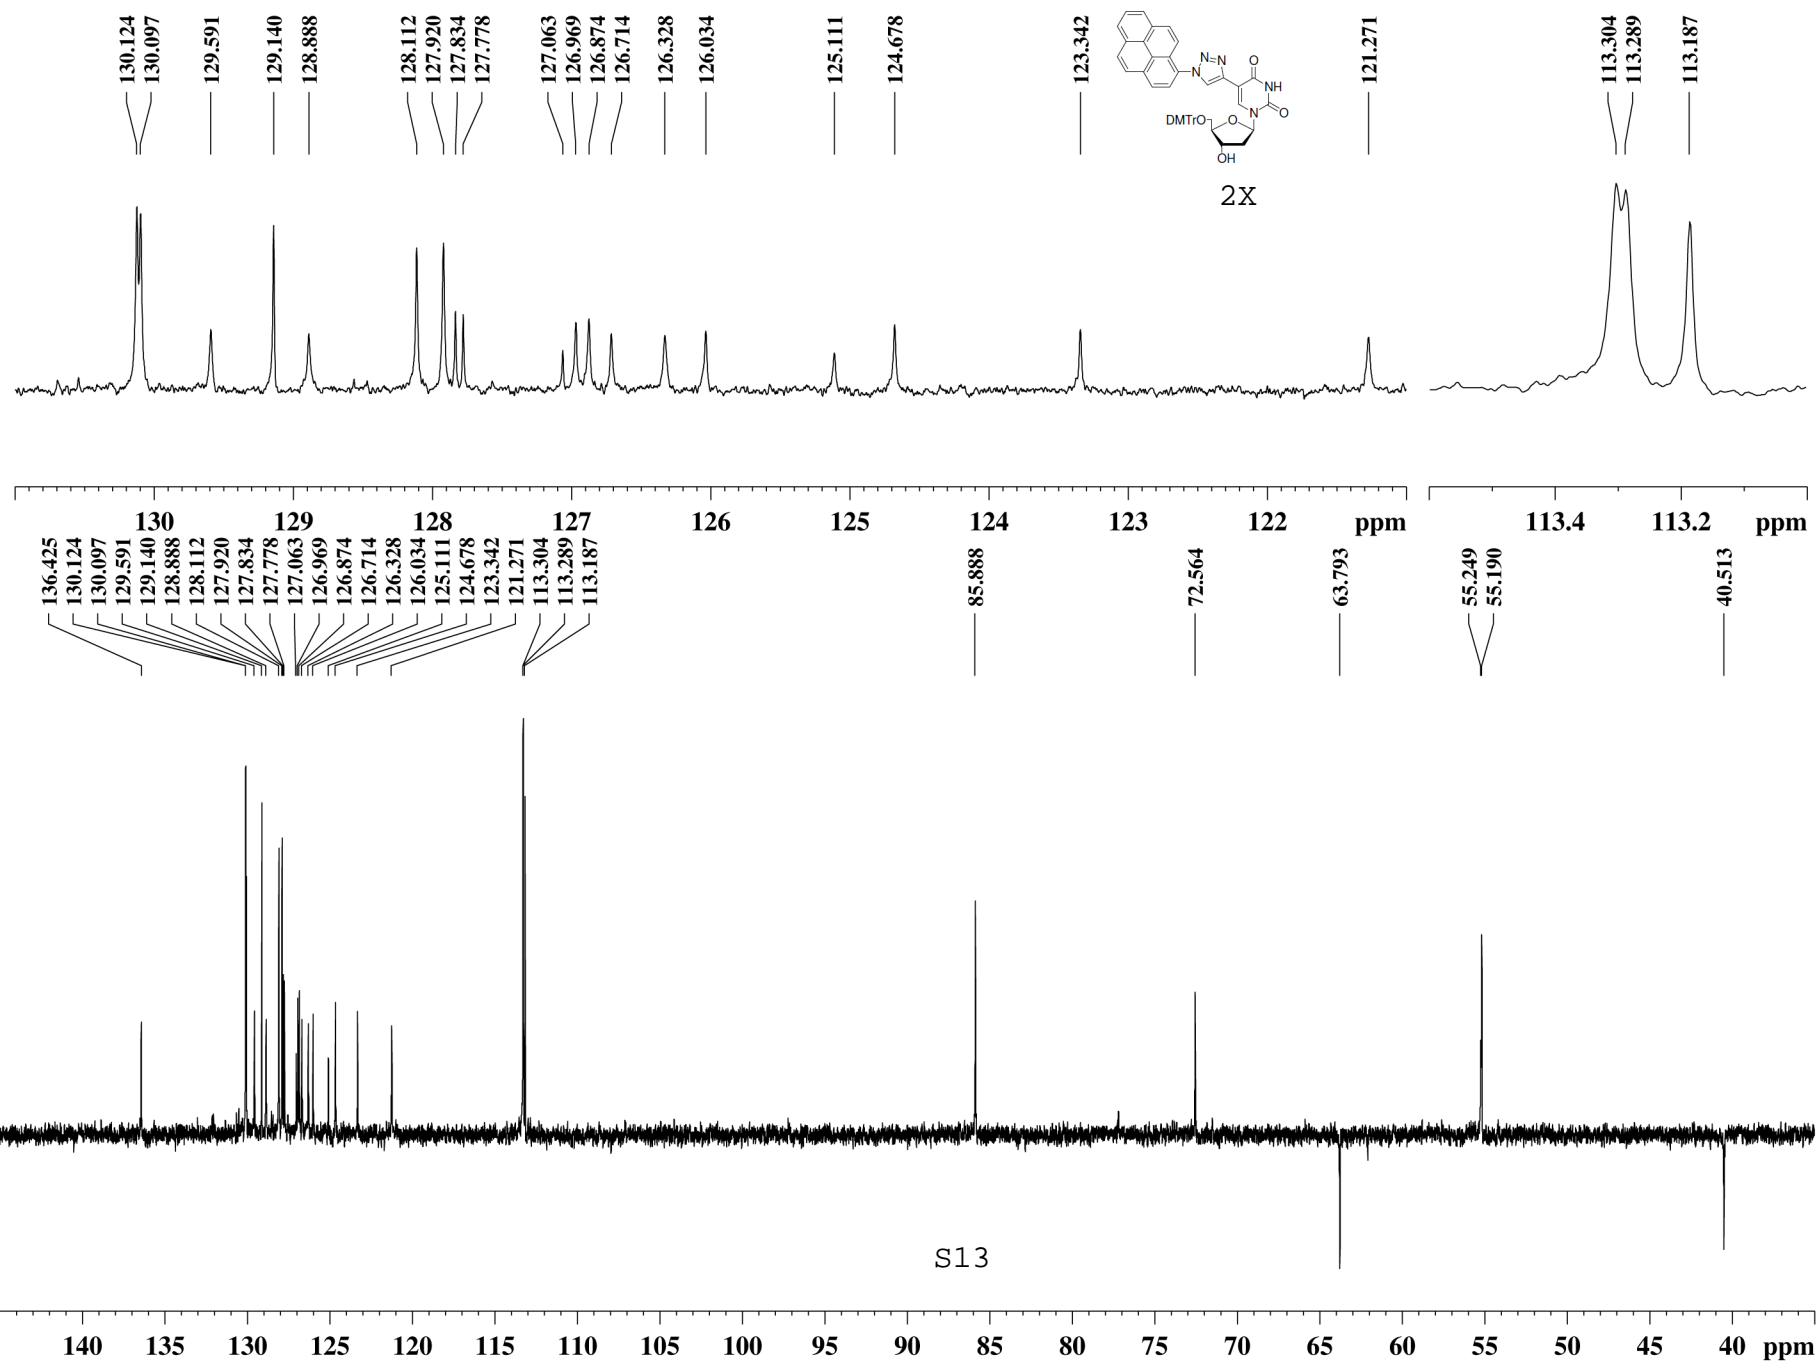

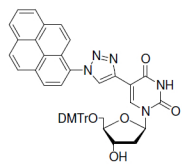

2X

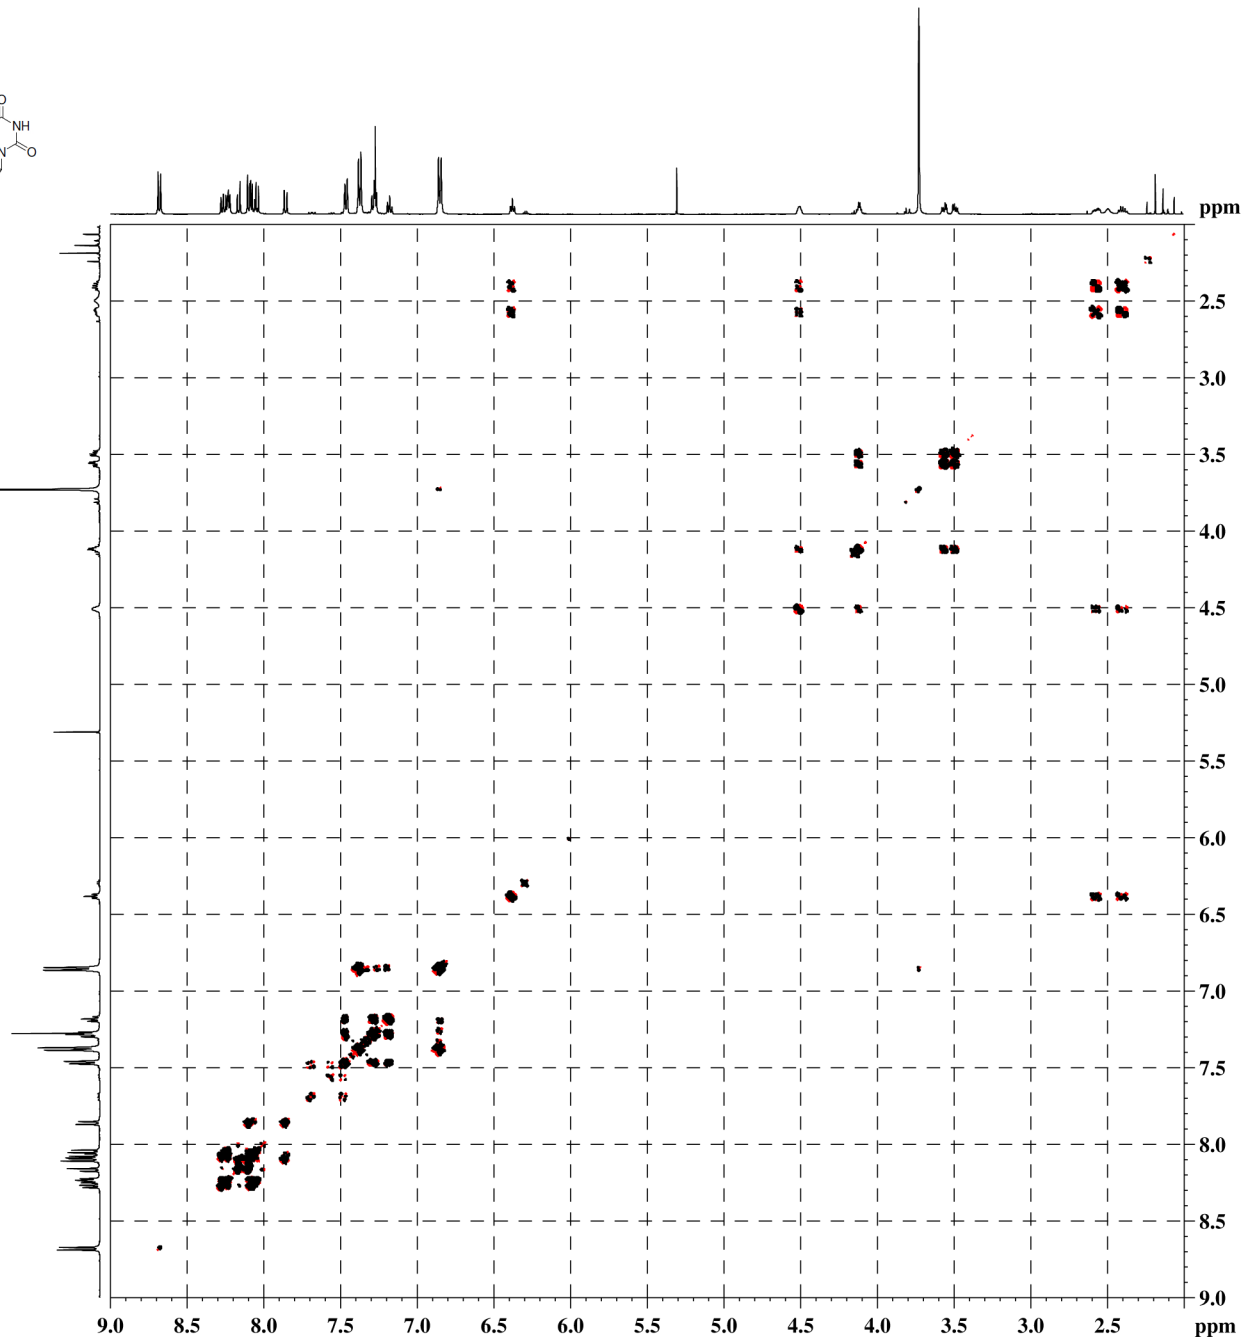

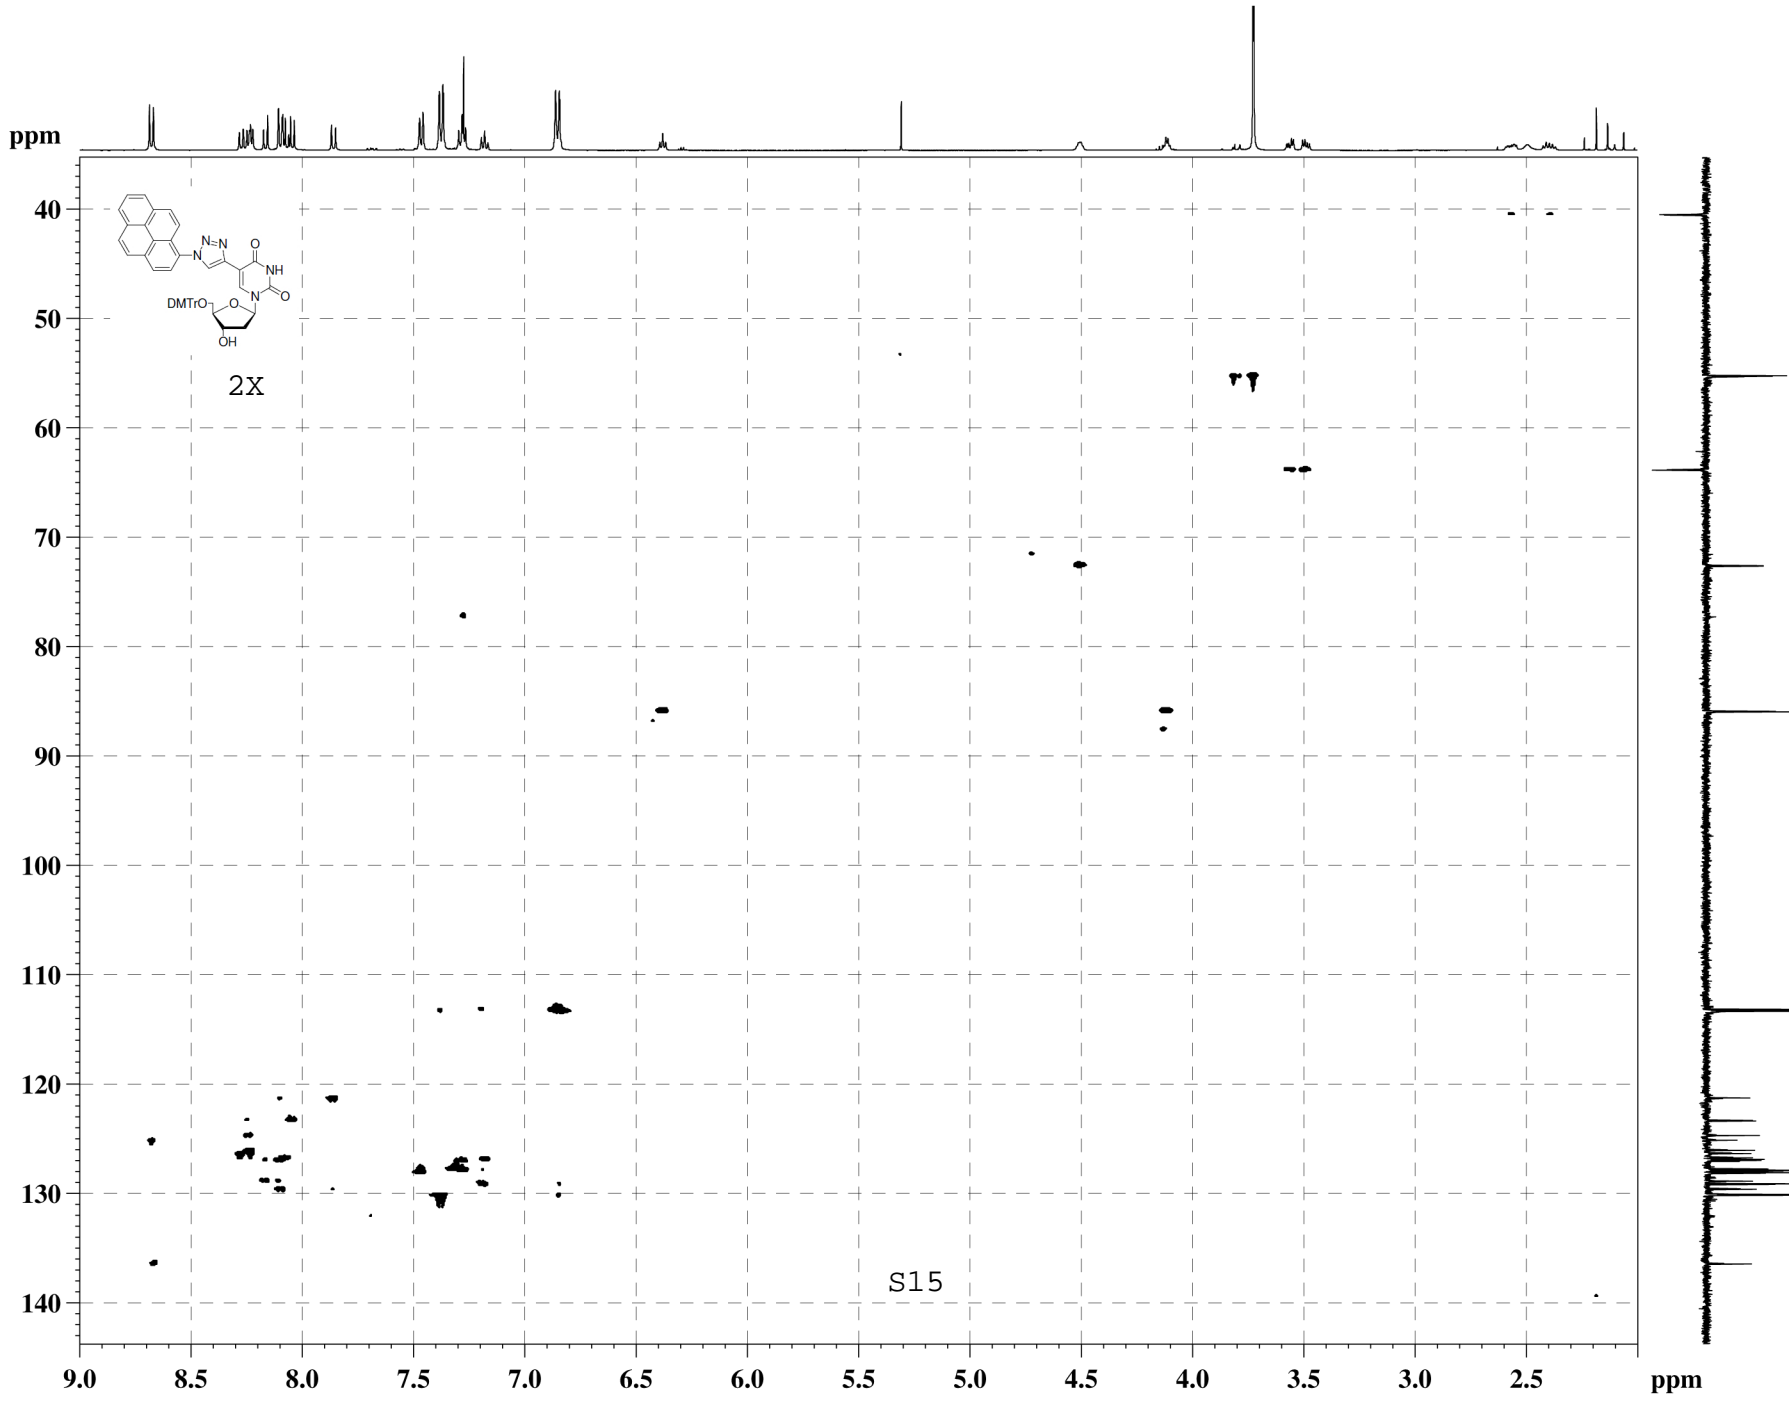

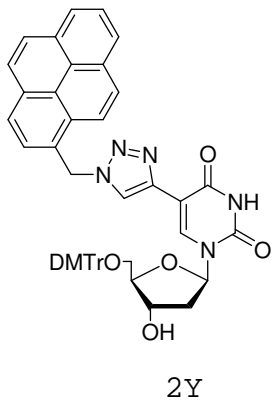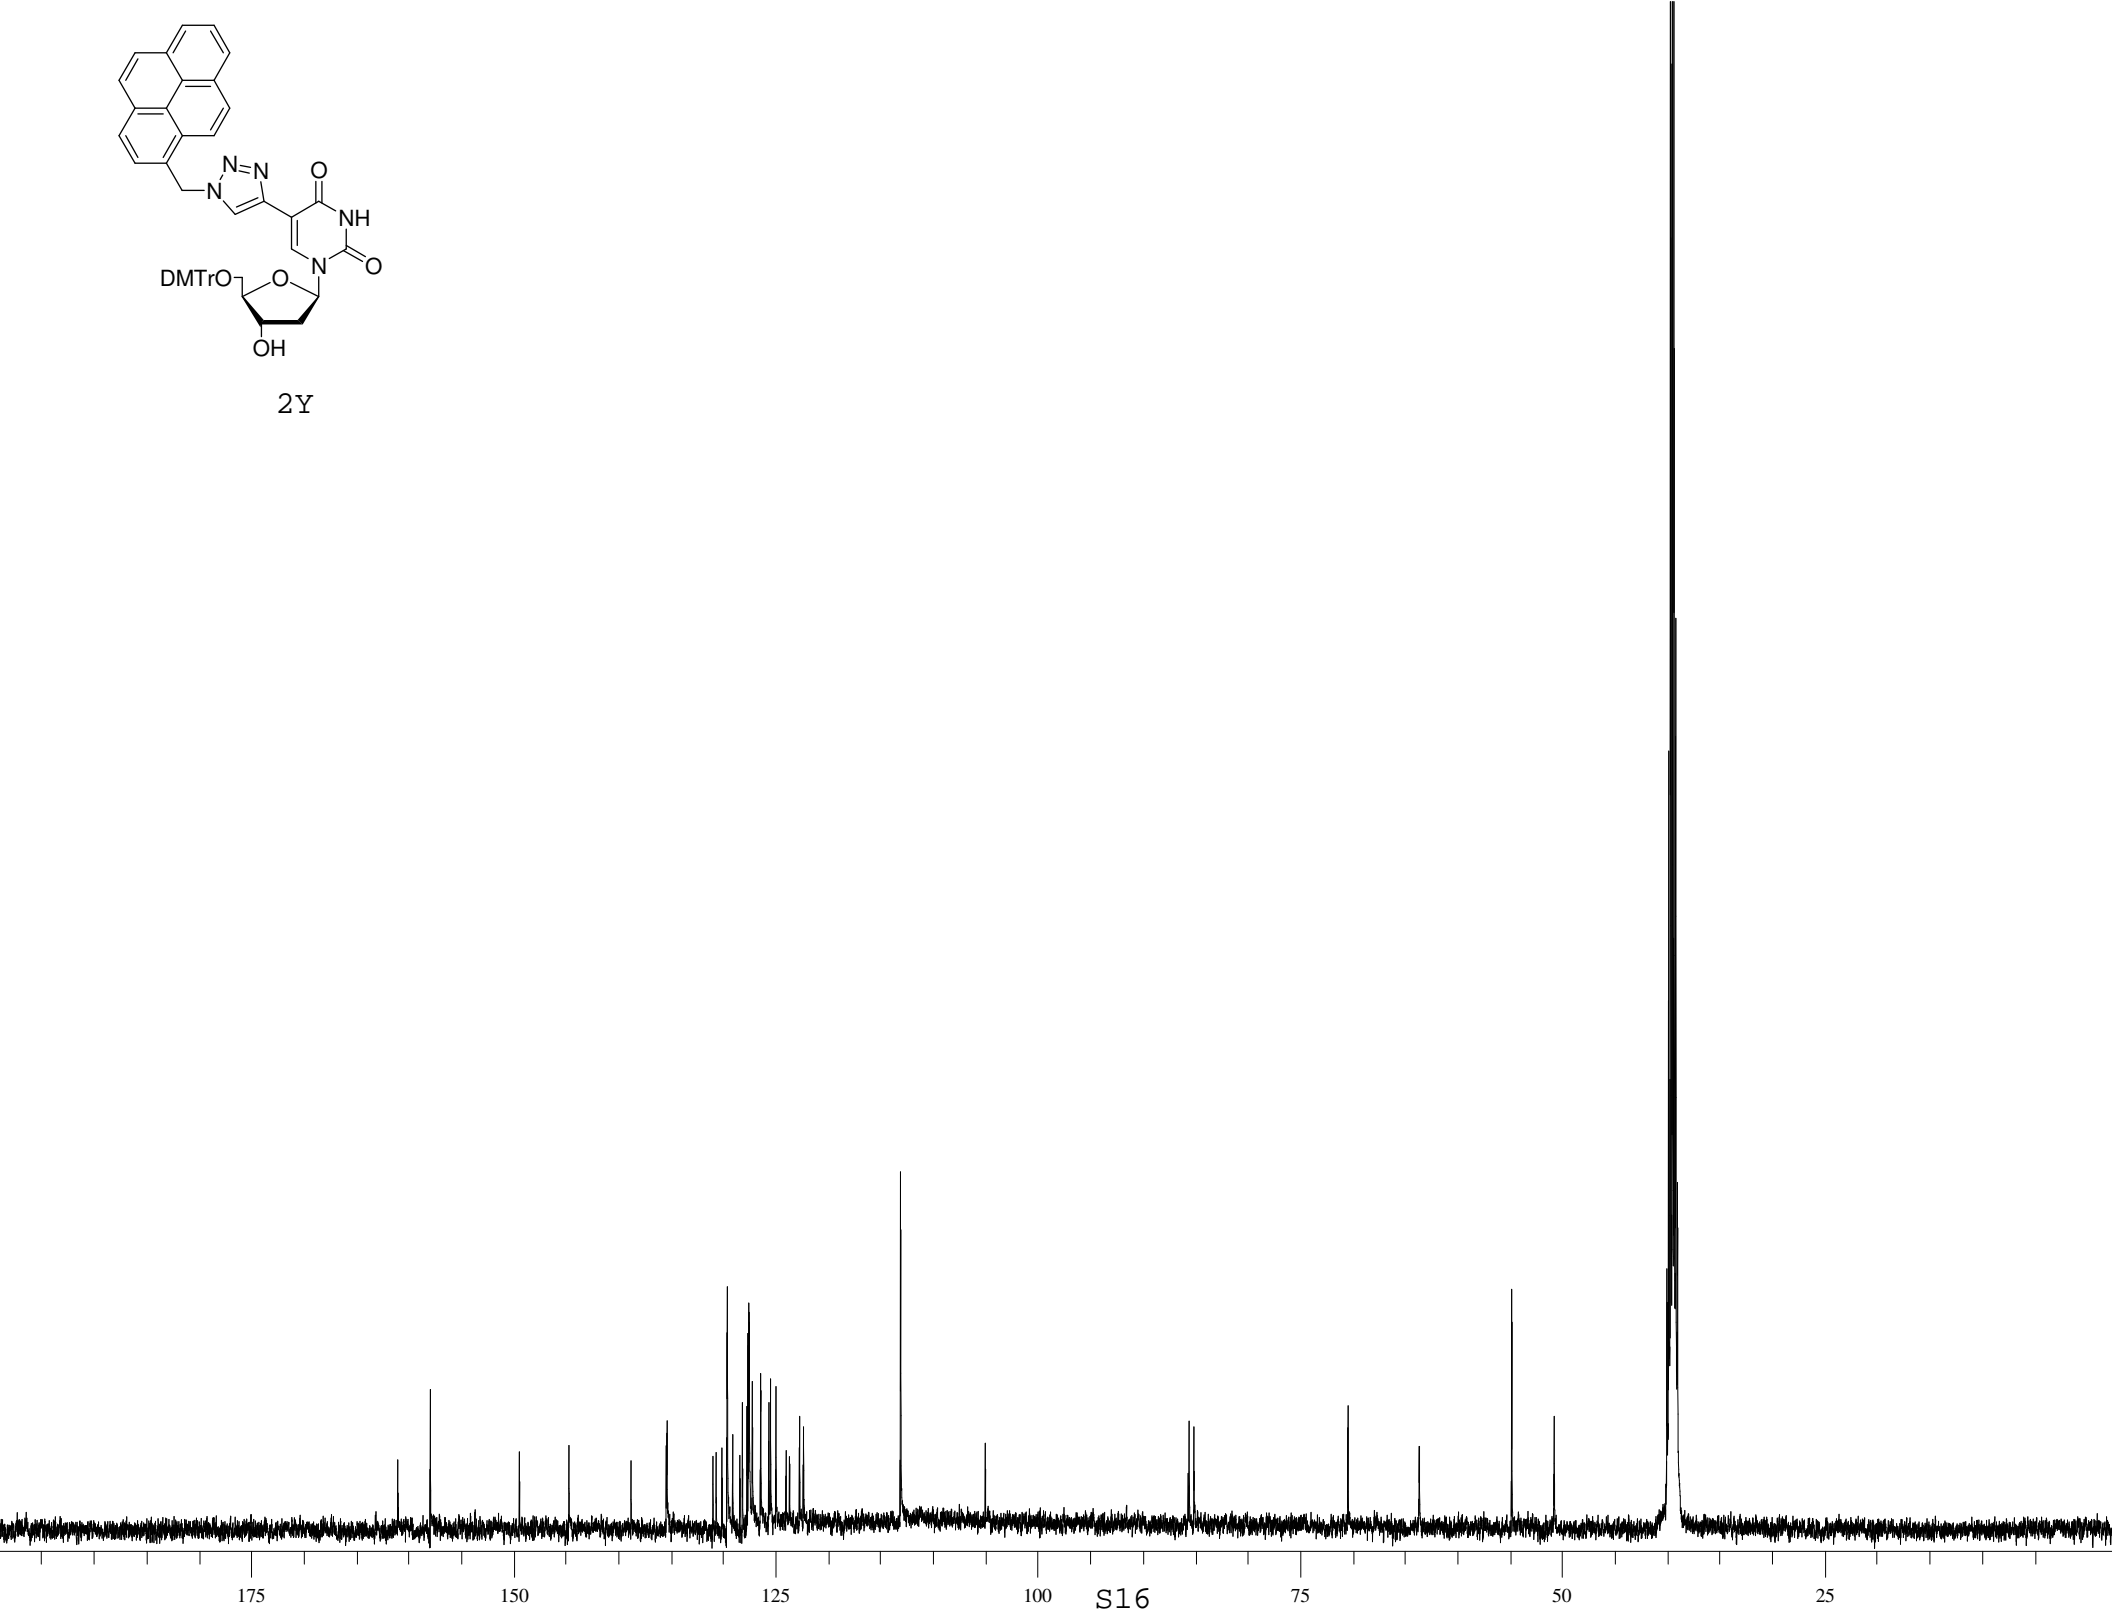

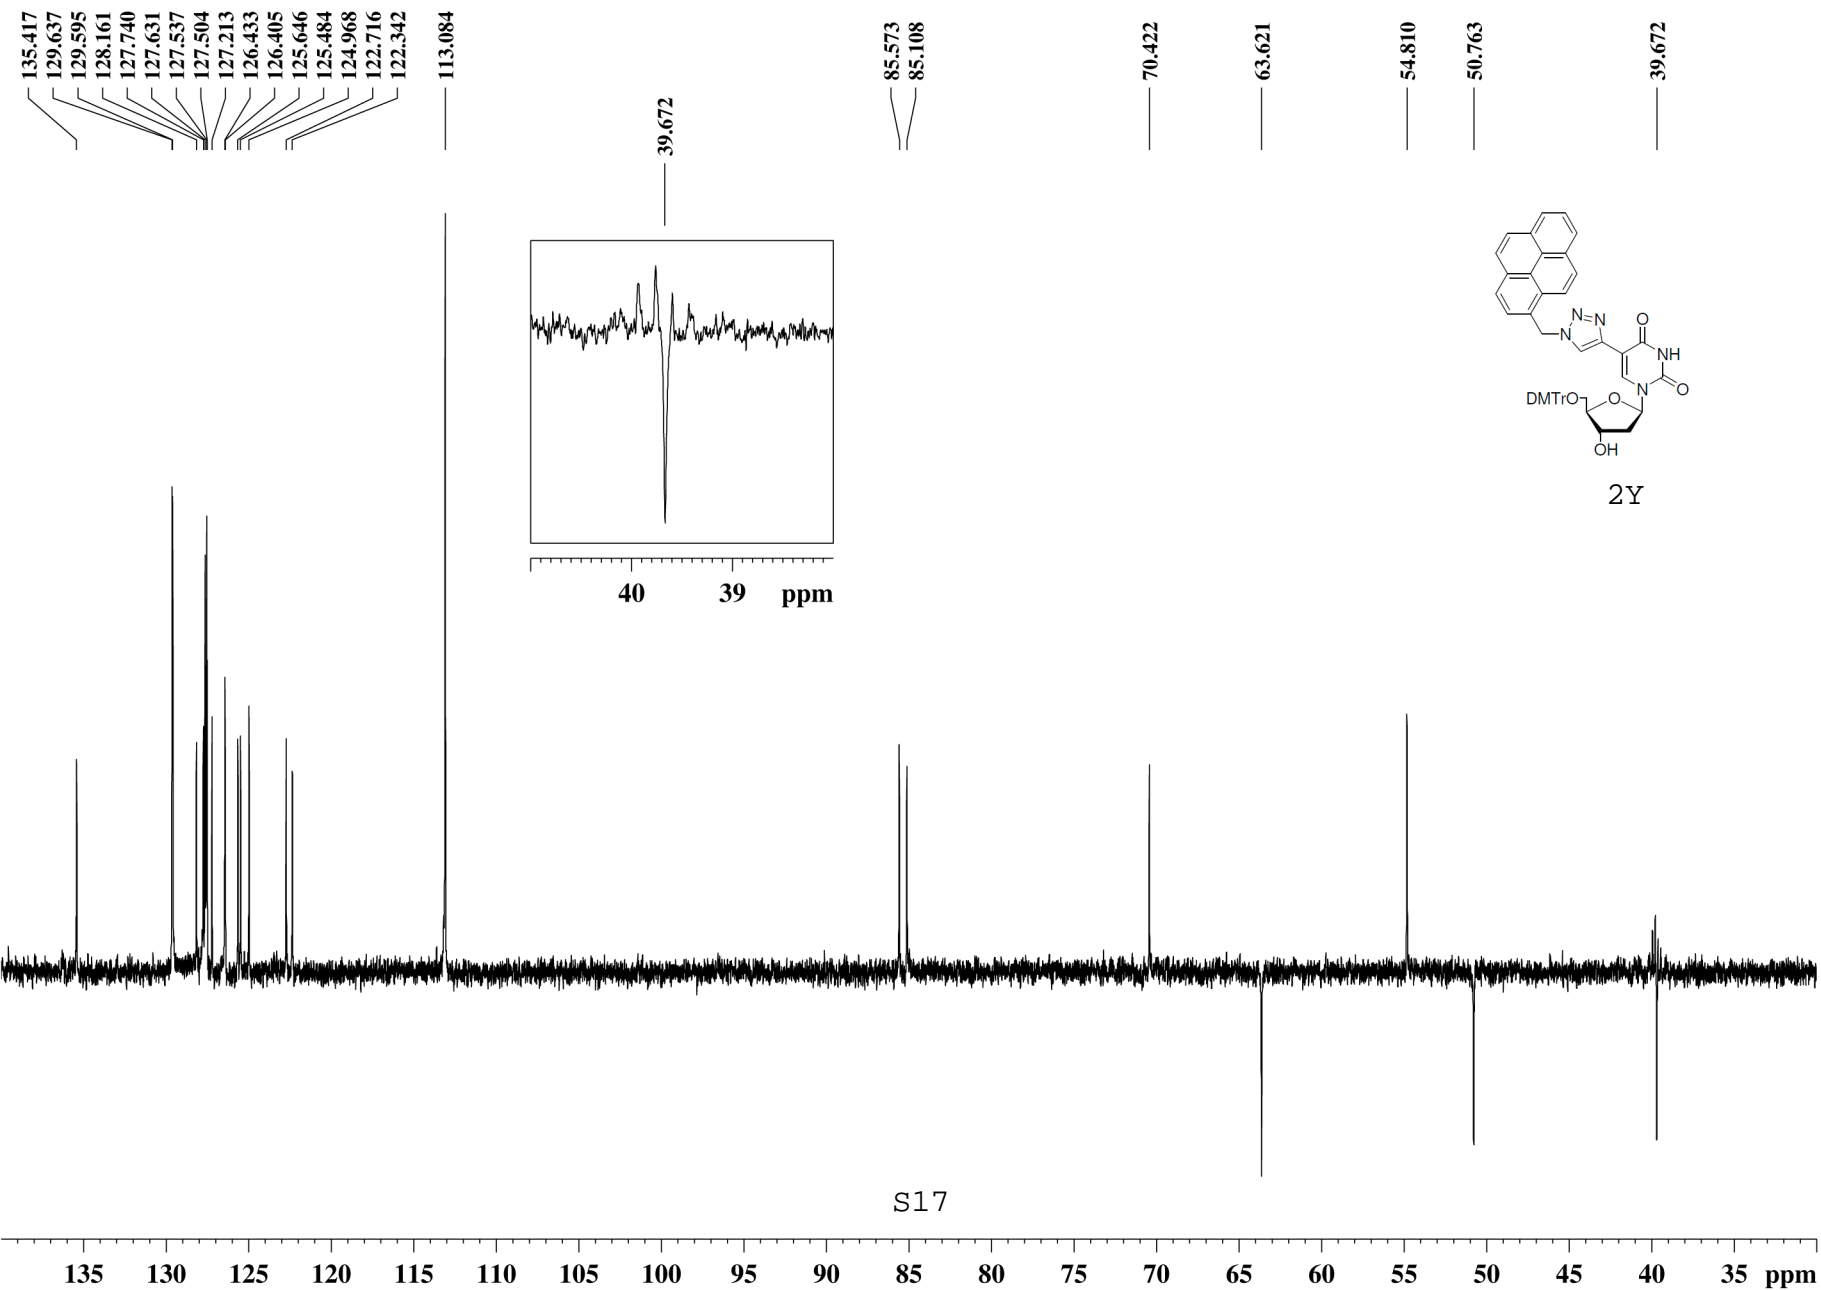

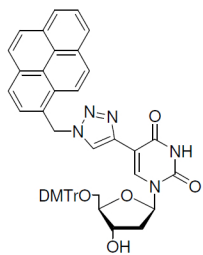

2Y

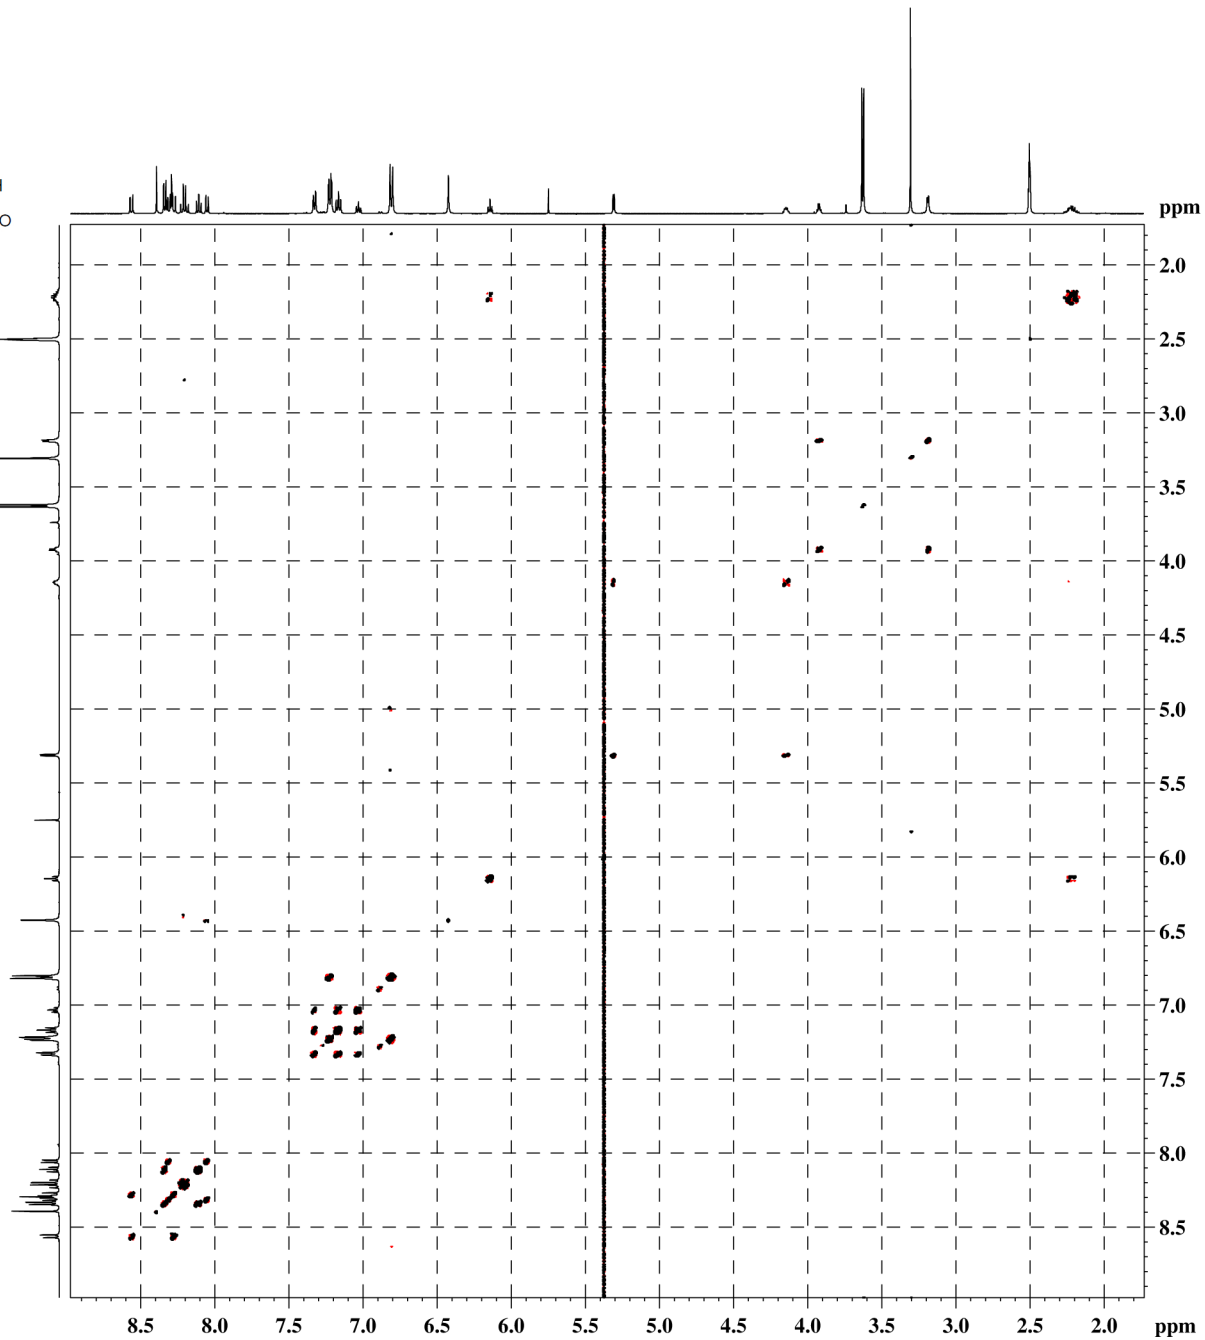

S18

ppm

40

50

60

70

80

90

100

110

120

130

140

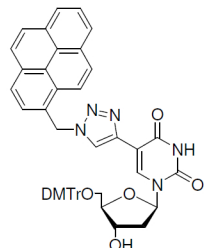

2Y

S19

ppm

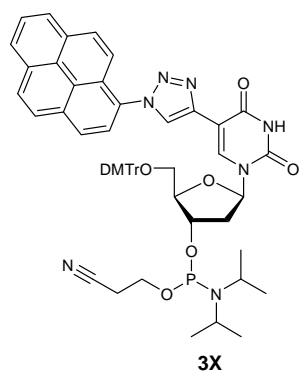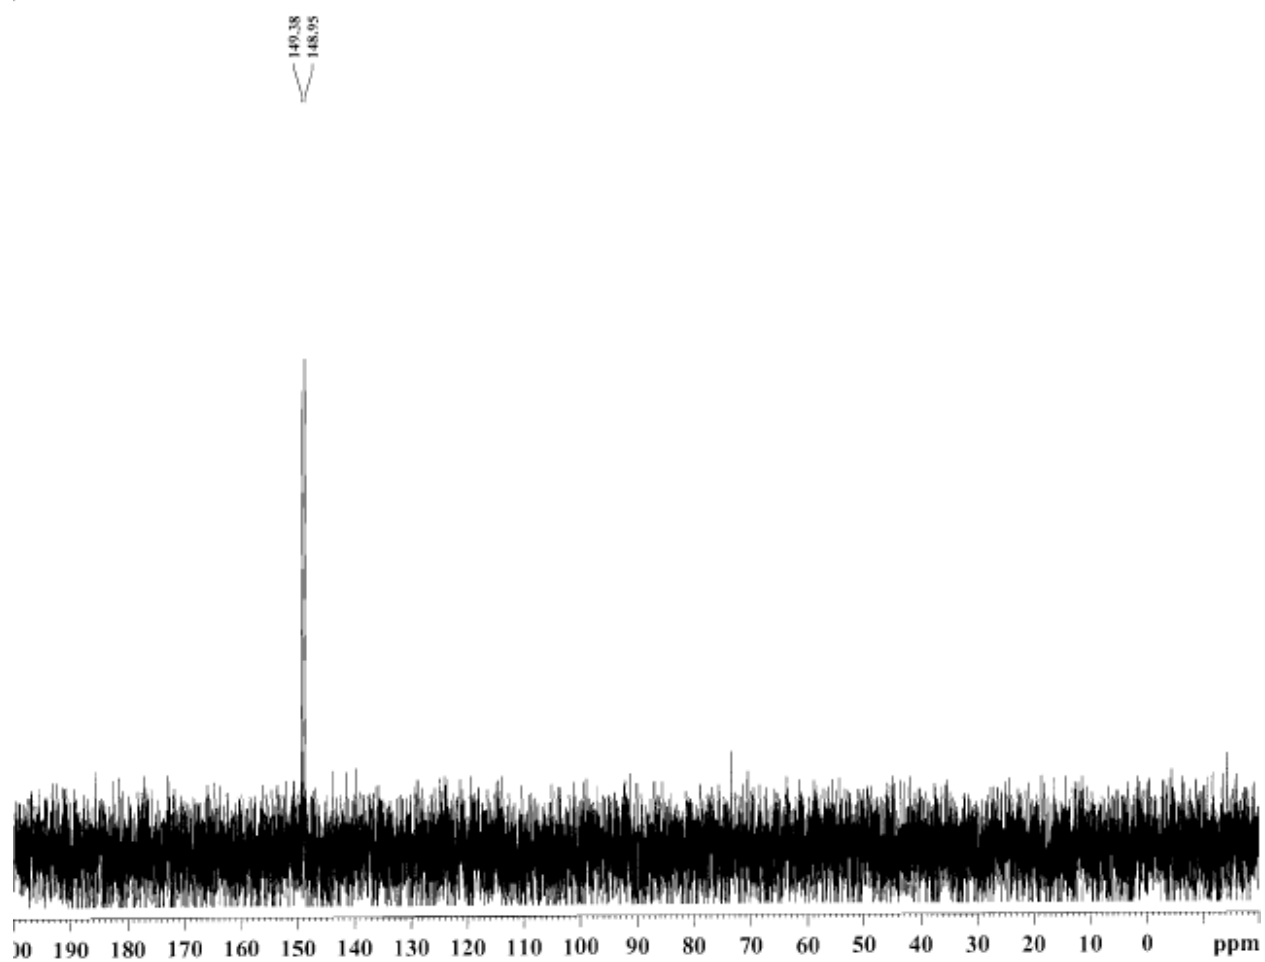



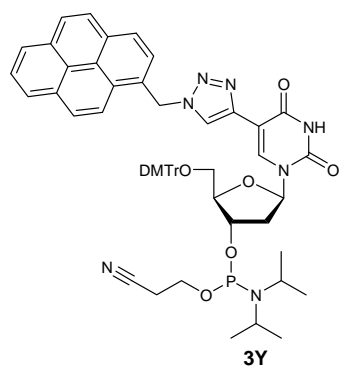

149.35  
148.87

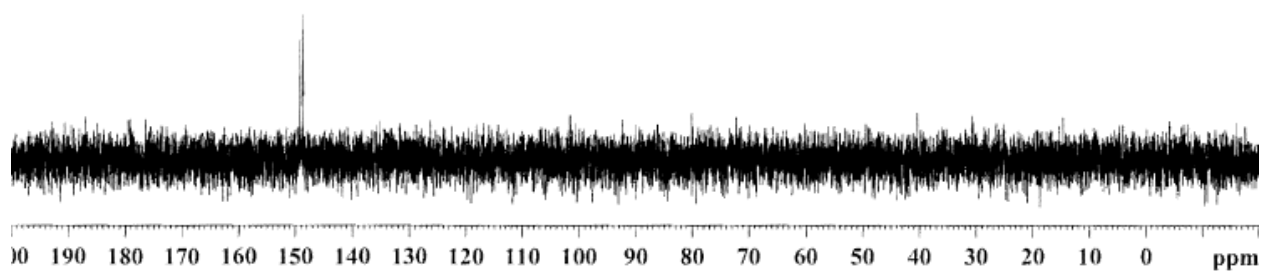

Supplement: c0cc01133a.pdf [file c0cc01133a.pdf]
